# Supplementary material for: Co-MOF as a sacrificial template: manifesting a new Co3O4/TiO2 system with a p–n heterojunction for photocatalytic hydrogen evolution
Source: Royal Society of Chemistry journal article supplement (doi:10.1039/c5ta05210f), 2015-01-01
Supplement: c5ta05210f1.pdf [file c5ta05210f1.pdf]

## Supporting Information

### Co-MOF as sacrificial template: Manifesting new Co<sub>3</sub>O<sub>4</sub>/TiO<sub>2</sub> system with *p-n* heterojunction for photocatalytic hydrogen evolution

#### Molecular formula

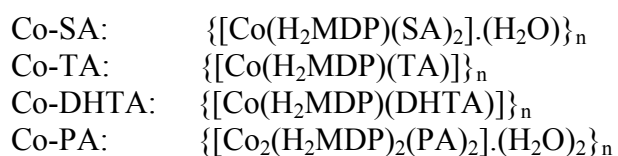

H<sub>2</sub>MDP: Methylene bis (3,5-dimethylpyrazole)

#### Synthesis of MOFs:

##### (a) Synthesis of [Co(SA)(H<sub>2</sub>MDP)]<sub>n</sub> (Co-SA):

0.0204 g (0.1 mmol) of H<sub>2</sub>MDP, 0.0249 g (0.1 mmol) of Co(OAc)<sub>2</sub>·4H<sub>2</sub>O and 0.0138 g (0.1 mmol) of salicylic acid (SA) were dissolved in 1:1 mixture of water, methanol and heated to 75 °C in a sealed container for 3 days. Afterwards, the container was cooled to room temperature slowly. Purple block shaped crystals were obtained, which were filtered, washed with methanol and dried in air (77% yield based on H<sub>2</sub>MDP). Elemental analysis for C<sub>25</sub>H<sub>26</sub>CoN<sub>4</sub>O<sub>7</sub> calcd (%): C 54.2, H 4.69, N 10.12, Found: C 55.72, H 4.83, N 10.56. IR (KBr cm<sup>-1</sup>): 3353(b), 1587(s), 1485(s), 1450(s), 1392(s), 1251(s).

##### (b) Synthesis of [Co(TA)(H<sub>2</sub>MDP)]<sub>n</sub> (Co-TA):

To a mixture of Co(NO<sub>3</sub>)<sub>2</sub>·6H<sub>2</sub>O (0.0291 g, 0.1 mmol) H<sub>2</sub>MDP (0.0204 g, 0.1 mmol), terephthalic acid (TA) (0.0244 g, 0.1 mmol), 1 ml of distilled water, 1 ml of DMF and 3 ml of methanol were added. Then the mixture was heated to 120°C for 72 h in a 25 ml sealed Teflon-lined autoclave. Afterward, the autoclave was slowly cooled down to room temperature and cube shaped purple crystals were obtained (73% yield based on H<sub>2</sub>MDP). Elemental analysis for C<sub>19</sub>H<sub>20</sub>CoN<sub>4</sub>O<sub>4</sub> calcd (%): C 42.6, H 3.92, N 10.47 Found: C 42.68, H 3.56, N 11.19. IR (KBr cm<sup>-1</sup>): 3404(b), 2974(ms), 1568(s), 1359(s), 1296(s), 1193(s), 1080(s), 1014(s).

**(c) Synthesis of  $[\text{Co}(\text{DHTA})(\text{H}_2\text{MDP})(\text{H}_2\text{O})]_n$  (Co-DHTA):**

0.204 g, (0.1 mmol) of  $\text{H}_2\text{MDP}$  and 0.0198 g, (0.1 mmol) of 2,5-dihydroxyterephthalic acid (DHTA) were dissolved in a mixture of solution containing 3ml methanol, 1 ml water and 1 ml DMF and then 0.0291g,(0.1 mmol) of  $\text{Co}(\text{NO}_3)_2 \cdot 6\text{H}_2\text{O}$  was added to the mixture and heated to  $75^\circ\text{C}$  in a sealed container for 3 days. Afterwards, the container was cooled to room temperature slowly. Purple block shaped crystals were obtained, which were filtered, washed with methanol and dried in air (75% yield based on  $\text{H}_2\text{MDP}$ ). Elemental analysis for  $\text{C}_{19}\text{H}_{20}\text{CoN}_4\text{O}_6$  calcd (%): C 49.63, H 4.35, N 12.19, Found: C 49.38, H 4.27, N 11.94. IR (KBr  $\text{cm}^{-1}$ ):3431(b), 3195(b), 1575(s), 1490(s), 1413(s), 1232(s).

**(d) Synthesis of  $[\text{Co}(\text{PA})(\text{H}_2\text{MDP})]_n$  (Co-PA):**

0.0204 g, (0.1 mmol) of  $\text{H}_2\text{MDP}$  and 0.0388 g, 0.1 mmol of pamoic acid (PA) were dissolved in a mixture of solution containing 3 ml DMF, 1 ml methanol ,1 ml water and then 0.1 mmol of  $\text{Co}(\text{NO}_3)_2 \cdot 6\text{H}_2\text{O}$  was added to the mixture and heated to  $75^\circ\text{C}$  in a sealed container for 3 days. Afterwards, the container was cooled to room temperature slowly. Purple block shaped crystals were obtained, which were filtered, washed with methanol and dried in air (79% yield based on  $\text{H}_2\text{MDP}$ ). Elemental analysis for  $\text{C}_8\text{H}_{64}\text{Co}_2\text{N}_8\text{O}_{14}$  calcd (%): C 61.28, H 4.96, N 9.06, Found: C 60.64, H 5.31, N 9.53. IR (KBr  $\text{cm}^{-1}$  ):3353(b), 1660(s), 1554(s), 1456(s), 1394(s).

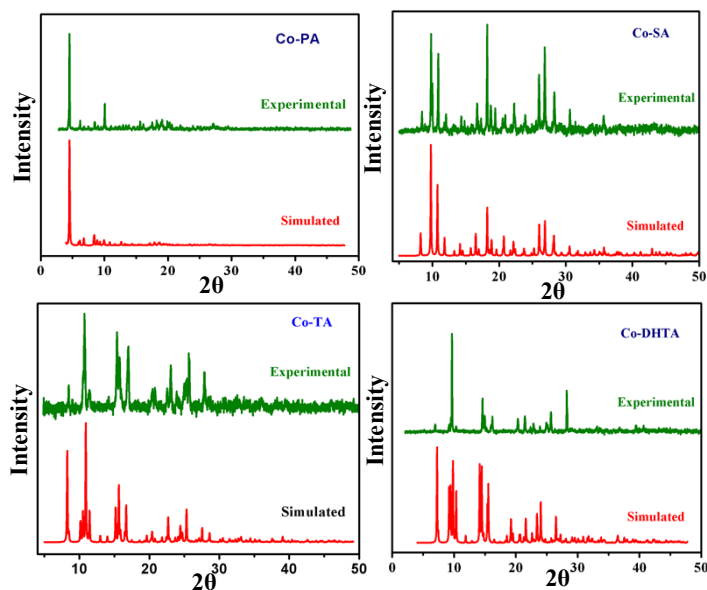

**Fig. S1** Simulated and experimental powder XRD pattern of the Co-MOF's.

**Table S1.** Crystal data and structure refinements for Co-MOFs.

|                                   | <b>Co-SA</b>                                                                  | <b>Co-TA</b>                                                                  | <b>Co-DHTA</b>                                                                | <b>Co-PA</b>                                                                   |
|-----------------------------------|-------------------------------------------------------------------------------|-------------------------------------------------------------------------------|-------------------------------------------------------------------------------|--------------------------------------------------------------------------------|
| empirical formula                 | C <sub>25</sub> H <sub>26</sub> Co <sub>4</sub> N <sub>4</sub> O <sub>7</sub> | C <sub>19</sub> H <sub>20</sub> Co <sub>4</sub> N <sub>4</sub> O <sub>4</sub> | C <sub>19</sub> H <sub>20</sub> Co <sub>4</sub> N <sub>4</sub> O <sub>6</sub> | C <sub>68</sub> H <sub>64</sub> Co <sub>2</sub> N <sub>8</sub> O <sub>14</sub> |
| formula weight                    | 553.43                                                                        | 427.32                                                                        | 459.32                                                                        | 1335.13                                                                        |
| crystal system                    | Monoclinic                                                                    | Monoclinic                                                                    | Monoclinic                                                                    | Monoclinic                                                                     |
| space group                       | <i>P2(1)/n</i>                                                                | <i>C2/c</i>                                                                   | <i>C2/c</i>                                                                   | <i>C2/c</i>                                                                    |
| <i>a</i> /Å                       | 10.4589(14)                                                                   | 19.2342(13)                                                                   | 19.2106(11)                                                                   | 38.226(7)                                                                      |
| <i>b</i> /Å                       | 13.3445(17)                                                                   | 13.4738(10)                                                                   | 13.5093(7)                                                                    | 13.456(2)                                                                      |
| <i>c</i> /Å                       | 18.115(2)                                                                     | 18.5923(13)                                                                   | 18.6918(16)                                                                   | 33.945(7)                                                                      |
| $\alpha$ /°                       | 90                                                                            | 90                                                                            | 90                                                                            | 90                                                                             |
| $\beta$ /°                        | 90.25                                                                         | 116.139(2)                                                                    | 116.602(2)                                                                    | 110.132(11)                                                                    |
| $\gamma$ /°                       | 90                                                                            | 90                                                                            | 90                                                                            | 90                                                                             |
| <i>V</i> /Å <sup>3</sup>          | 2528.2(6)                                                                     | 4325.6(5)                                                                     | 4337.4(5)                                                                     | 16394(5)                                                                       |
| reflections collected             | 36122                                                                         | 30203                                                                         | 24928                                                                         | 93123                                                                          |
| unique reflection                 | 7810                                                                          | 6133                                                                          | 4681                                                                          | 14029                                                                          |
| observed reflections[<br>I>2σ(I)] | 6637                                                                          | 2955                                                                          | 2824                                                                          | 5685                                                                           |
| <i>R</i> 1                        | 0.0406                                                                        | 0.1240                                                                        | 0.1249                                                                        | 0.0803                                                                         |
| <i>wR</i> 2                       | 0.1201                                                                        | 0.2969                                                                        | 0.3020                                                                        | 0.1887                                                                         |
| <b>CCDC no.</b>                   | <b>1407122</b>                                                                | <b>1407123</b>                                                                | <b>1407120</b>                                                                | <b>1407121</b>                                                                 |

**Table S2** Selective bond lengths and bond angles.

| <b>Co-SA</b>                     |            |                                                   |           |
|----------------------------------|------------|---------------------------------------------------|-----------|
| <b>Bond lengths</b>              |            | <b>Bond angles</b>                                |           |
| Co <sub>1</sub> -O <sub>4</sub>  | 1.9603(12) | O <sub>4</sub> -Co <sub>1</sub> -O <sub>1</sub>   | 110.39(5) |
| Co <sub>1</sub> -O <sub>1</sub>  | 1.9961(12) | O <sub>4</sub> -Co <sub>1</sub> -N <sub>3</sub>   | 119.70(5) |
| Co <sub>1</sub> -N <sub>3</sub>  | 2.0049(13) | O <sub>1</sub> -Co <sub>1</sub> -N <sub>3</sub>   | 114.64(5) |
| Co <sub>1</sub> -N <sub>1</sub>  | 2.0174(13) | O <sub>4</sub> -Co <sub>1</sub> -N <sub>1</sub>   | 108.45(5) |
|                                  |            | O <sub>1</sub> -Co <sub>1</sub> -N <sub>1</sub>   | 95.84(5)  |
|                                  |            | N <sub>3</sub> -Co <sub>1</sub> -N <sub>1</sub>   | 104.65(5) |
| <b>Co-TA</b>                     |            |                                                   |           |
| Co <sub>1</sub> -O <sub>2B</sub> | 1.897(5)   | O <sub>2B</sub> -Co <sub>1</sub> -O <sub>2A</sub> | 110.7(3)  |
| Co <sub>1</sub> -O <sub>2A</sub> | 1.922(6)   | O <sub>2A</sub> -Co <sub>1</sub> -N <sub>2</sub>  | 113.7(3)  |
| Co <sub>1</sub> -N <sub>2</sub>  | 1.982(5)   | O <sub>2B</sub> -Co <sub>1</sub> -N <sub>3</sub>  | 112.1(3)  |
| Co <sub>1</sub> -N <sub>3</sub>  | 2.021(6)   | O <sub>2A</sub> -Co <sub>1</sub> -N <sub>3</sub>  | 104.7(3)  |
|                                  |            | N <sub>2</sub> -Co <sub>1</sub> -N <sub>3</sub>   | 106.1(2)  |
| <b>Co-DHTA</b>                   |            |                                                   |           |
| Co <sub>1</sub> -O <sub>4</sub>  | 1.877(12)  | O <sub>4</sub> -Co <sub>1</sub> -O <sub>1</sub>   | 106.3(4)  |
| Co <sub>1</sub> -O <sub>1</sub>  | 1.950(5)   | O <sub>4</sub> -Co <sub>1</sub> -N <sub>3</sub>   | 108.7(4)  |
| Co <sub>1</sub> -N <sub>3</sub>  | 1.994(5)   | O <sub>1</sub> -Co <sub>1</sub> -N <sub>3</sub>   | 113.6(2)  |
| Co <sub>1</sub> -N <sub>1</sub>  | 1.997(6)   | O <sub>4</sub> -Co <sub>1</sub> -N <sub>1</sub>   | 119.2(4)  |

|                                  |           |                                                   |            |
|----------------------------------|-----------|---------------------------------------------------|------------|
| Co <sub>1</sub> -O <sub>5'</sub> | 2.122(14) | O <sub>1</sub> -Co <sub>1</sub> -N <sub>1</sub>   | 101.3(2)   |
| Co <sub>1</sub> -O <sub>4'</sub> | 2.351(15) | N <sub>3</sub> -Co <sub>1</sub> -N <sub>1</sub>   | 107.7(2)   |
|                                  |           | O <sub>4</sub> -Co <sub>1</sub> -O <sub>5'</sub>  | 24.6(4)    |
|                                  |           | O <sub>1</sub> -Co <sub>1</sub> -O <sub>5'</sub>  | 118.8(4)   |
|                                  |           | N <sub>3</sub> -Co <sub>1</sub> -O <sub>5'</sub>  | 116.3(4)   |
|                                  |           | N <sub>1</sub> -Co <sub>1</sub> -O <sub>5'</sub>  | 95.0(4)    |
|                                  |           | O <sub>4</sub> -Co <sub>1</sub> -O <sub>4'</sub>  | 32.3(5)    |
|                                  |           | O <sub>1</sub> -Co <sub>1</sub> -O <sub>4'</sub>  | 92.9(4)    |
|                                  |           | N <sub>3</sub> -Co <sub>1</sub> -O <sub>4'</sub>  | 88.5(4)    |
|                                  |           | N <sub>1</sub> -Co <sub>1</sub> -O <sub>4'</sub>  | 151.5(4)   |
|                                  |           | O <sub>5'</sub> -Co <sub>1</sub> -O <sub>4'</sub> | 56.5(5)    |
| <b>Co-PA</b>                     |           |                                                   |            |
| Co <sub>1</sub> -O <sub>1C</sub> | 1.951(4)  | O <sub>1C</sub> -Co <sub>1</sub> -O <sub>1B</sub> | 113.52(18) |
| Co <sub>1</sub> -O <sub>1B</sub> | 1.987(4)  | O <sub>1C</sub> -Co <sub>1</sub> -N <sub>1A</sub> | 111.3(2)   |
| Co <sub>1</sub> -N <sub>1A</sub> | 1.999(5)  | O <sub>1B</sub> -Co <sub>1</sub> -N <sub>1A</sub> | 101.8(2)   |
| Co <sub>1</sub> -N <sub>7A</sub> | 2.009(5)  | O <sub>1C</sub> -Co <sub>1</sub> -N <sub>7A</sub> | 111.4(2)   |
| Co <sub>2</sub> -N <sub>5A</sub> | 2.036(5)  | O <sub>1B</sub> -Co <sub>1</sub> -N <sub>7A</sub> | 112.7(2)   |
| Co <sub>2</sub> -N <sub>3A</sub> | 2.040(5)  | N <sub>1A</sub> -Co <sub>1</sub> -N <sub>7A</sub> | 105.3(2)   |
| Co <sub>2</sub> -O <sub>5C</sub> | 2.077(4)  | N <sub>5A</sub> -Co <sub>2</sub> -N <sub>3A</sub> | 97.69(19)  |
| Co <sub>2</sub> -O <sub>5B</sub> | 2.161(4)  | N <sub>5A</sub> -Co <sub>2</sub> -O <sub>5C</sub> | 108.84(19) |
| Co <sub>2</sub> -O <sub>4B</sub> | 2.200(4)  | N <sub>3A</sub> -Co <sub>2</sub> -O <sub>5C</sub> | 96.7(2)    |
| Co <sub>2</sub> -O <sub>4C</sub> | 2.289(4)  | N <sub>5A</sub> -Co <sub>2</sub> -O <sub>5B</sub> | 97.50(19)  |
|                                  |           | N <sub>3A</sub> -Co <sub>2</sub> -O <sub>5B</sub> | 103.76(19) |
|                                  |           | O <sub>5C</sub> -Co <sub>2</sub> -O <sub>5B</sub> | 144.04(17) |
|                                  |           | N <sub>5A</sub> -Co <sub>2</sub> -O <sub>4B</sub> | 156.93(18) |
|                                  |           | N <sub>3A</sub> -Co <sub>2</sub> -O <sub>4B</sub> | 86.54(17)  |
|                                  |           | O <sub>5C</sub> -Co <sub>2</sub> -O <sub>4B</sub> | 93.06(17)  |
|                                  |           | O <sub>5B</sub> -Co <sub>2</sub> -O <sub>4B</sub> | 59.56(16)  |
|                                  |           | N <sub>5A</sub> -Co <sub>2</sub> -O <sub>4C</sub> | 94.20(17)  |
|                                  |           | N <sub>3A</sub> -Co <sub>2</sub> -O <sub>4C</sub> | 156.74(19) |
|                                  |           | O <sub>5C</sub> -Co <sub>2</sub> -O <sub>4C</sub> | 60.47(16)  |
|                                  |           | O <sub>5B</sub> -Co <sub>2</sub> -O <sub>4C</sub> | 94.37(16)  |
|                                  |           | O <sub>4B</sub> -Co <sub>2</sub> -O <sub>4C</sub> | 90.31(15)  |

**Table S3** Experimental amount (wt %) of element in the different photocatalyst nanocomposites (FESEM-EDX analysis)

| Nanocomposite  | Elements (wt %) |       |       |
|----------------|-----------------|-------|-------|
|                | Co              | Ti    | O     |
| <b>NC-PA</b>   | 1.03            | 54.72 | 44.25 |
| <b>NC-SA</b>   | 0.82            | 45.47 | 53.71 |
| <b>NC-DHTA</b> | 1.00            | 57.27 | 41.73 |
| <b>NC-TA</b>   | 0.80            | 53.89 | 45.31 |

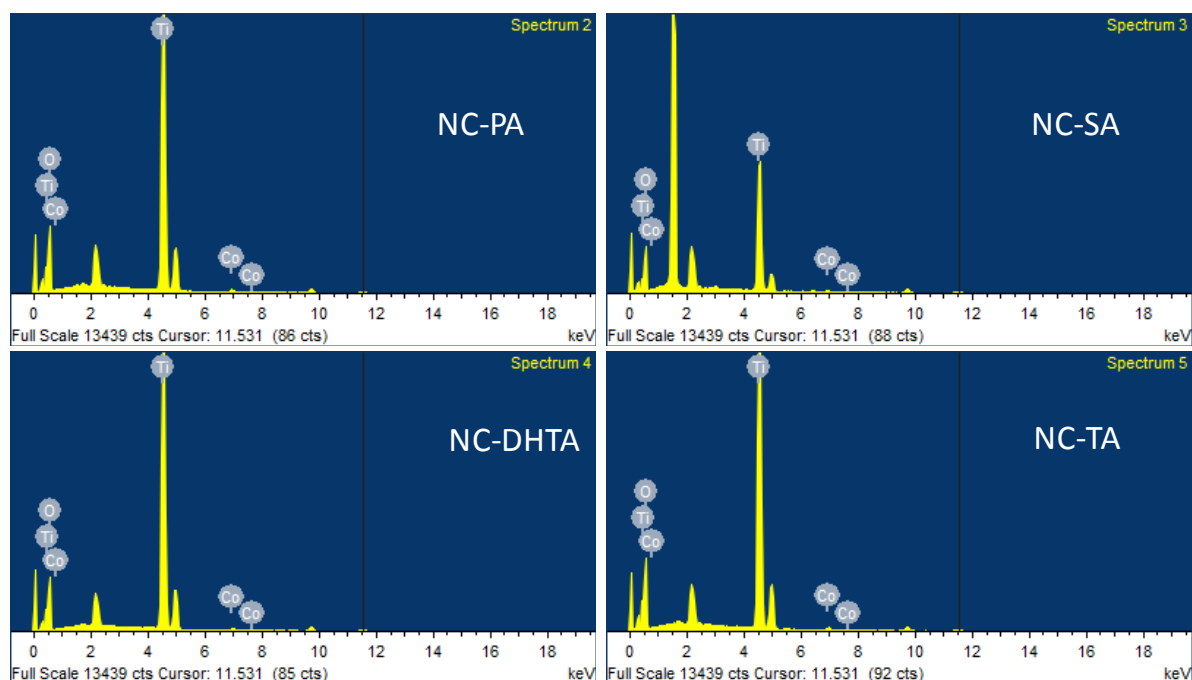

**Fig. S2** FESEM-EDX pattern of different photocatalyst nanocomposites.

### Thermal properties of MOFs

Thermo gravimetric analysis (TGA) of **Co(PA-TA)** were performed under  $N_2$  atmosphere in an aluminium crucible at a rate of  $10\text{ }^\circ\text{C min}^{-1}$ . All these data were collected in the temperature range  $30\text{-}700\text{ }^\circ\text{C}$ . For **Co-SA** two identifiable weight loss occurred. First weight loss 2.503% (calcd: 3.25%) in the temperature range  $70\text{-}295\text{ }^\circ\text{C}$  for the removal of lattice water molecule and at  $325\text{ }^\circ\text{C}$ , **Co-SA** has lost its weight about 25.32% (calcd: 24.75%) for the removal of one salicylic acid molecule and then it was completely decomposed. **Co-TA** showed a weight loss of about 6% (calcd: 7.07%) for the removal of one methanol molecule at about  $315\text{ }^\circ\text{C}$  and then decomposed completely. **Co-DHTA** was stable up to  $\sim 380\text{ }^\circ\text{C}$  and no such weight loss showed and then it was decomposed. For **Co-PA** first break occurred at  $137\text{ }^\circ\text{C}$  and weight loss was 2.8% (calcd: 2.6%) for the removal of two non coordinate water molecule and then lost its weight about 8.051% (calcd: 8.37%) at  $210\text{ }^\circ\text{C}$  for the removal of one DMF molecule and then the compound was completely decomposed at  $395\text{ }^\circ\text{C}$ .

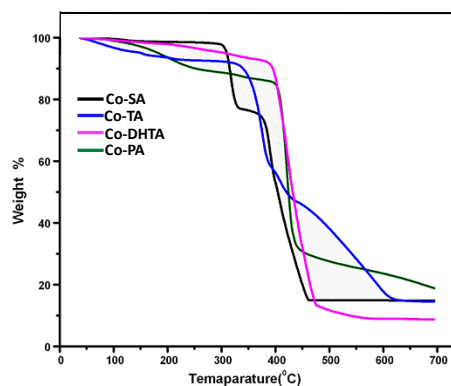

**Fig. S3** TGA of different cobalt MOFs.

## Gas Adsorption studies of MOFs

The presence of distinct solvent filled channels and pores inside the above-mentioned frameworks prompted us to evaluate their absorbent potentials. We report herein  $N_2$ ,  $H_2$ , and  $CO_2$  gas sorption of all compounds. Gas adsorption measurements for all compounds were performed at 77 K for  $N_2$  in a Quantachrome Autosorb-1 instrument at lower pressures ranging from 0 to 1 atm. For compound 4,  $N_2$  and  $H_2$  uptake measurements were performed at 77 K within the same pressure range in a Quantachrome Quadrasorb automatic volumetric instrument. However,  $CO_2$  adsorption measurements for the same were performed at 273 K temperature. In all measurements, ultrahigh-purity adsorbents ( $N_2$ ,  $H_2$ , and  $CO_2$ ) were obtained by using calcium aluminosilicate adsorbents to remove trace amounts of moisture and other impurities present in these gases prior to introducing them into sample. In order to achieve partial or complete removal of solvent molecules (as observed from single crystal structures), the crystals were soaked in a 1:1 mixture of methanol and dichloromethane for 48 h. The resultant solvent-exchanged crystals were then heated at 60 °C under high vacuum for 12 h and at 150 °C for 24 h in order to remove the solvent molecules from the frameworks. After thermal activation of samples, retention of the framework integrity, an essential prerequisite for gas sorption experiments, was confirmed by PXRD patterns. After this treatment, a 100 mg sample of each of the compounds was loaded for gas adsorption studies, and validity of the  $N_2$ ,  $H_2$ , and  $CO_2$  adsorption isotherms obtained was confirmed by repeating the data collection at least three times.

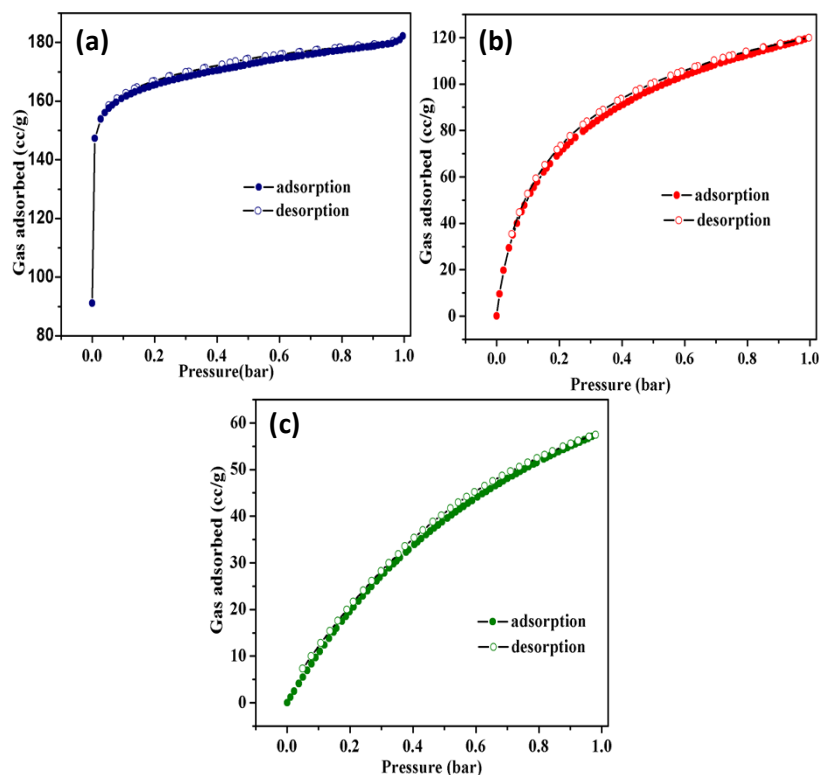

**Fig. S4** (a)  $N_2$  gas (b)  $H_2$  gas and (c)  $CO_2$  gas adsorption isotherm of Co-PA.

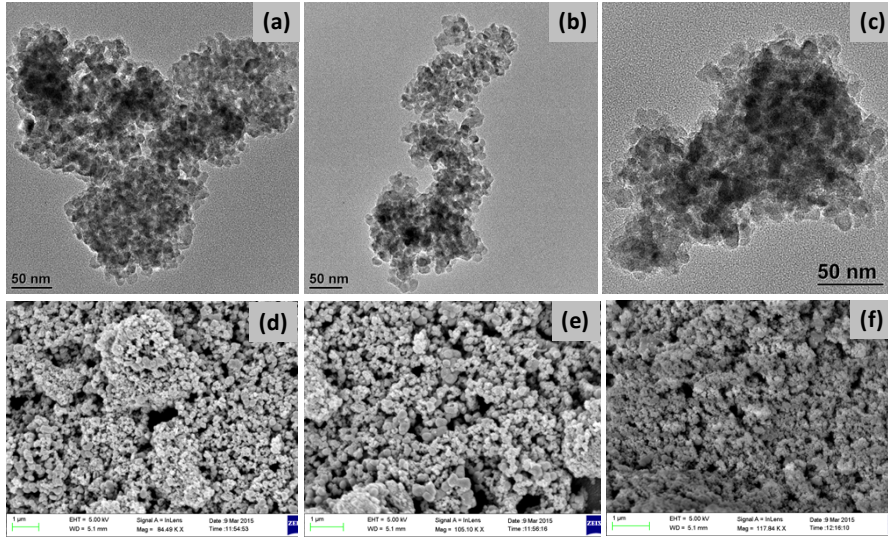

**Fig. S5** TEM images of (a) NC-SA, (b) NC-DHTA, (c) NC-TA and FESEM images of (d) NC-SA, (e) NC-DHTA and (f) NC-TA.

### Gas Adsorption studies of nanocomposites

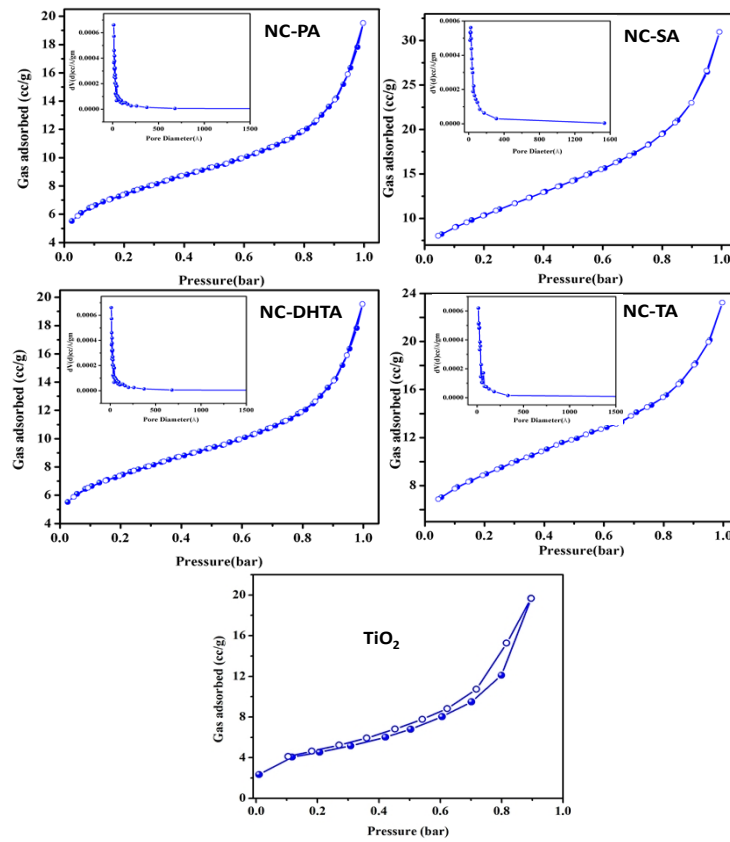

**Fig. S6** N<sub>2</sub> adsorption isotherm and pore size distribution of different C<sub>3</sub>O<sub>4</sub>/TiO<sub>2</sub> nanocomposites and bare TiO<sub>2</sub>.

**Table S4** Gas adsorption data of different nanocomposites

|                                     | Co-PA | NC-SA | NC-TA | NC-PA | NC-DHTA |
|-------------------------------------|-------|-------|-------|-------|---------|
| N <sub>2</sub> Gas Adsorbed(cc/g)   | 182.2 | 30.96 | 11.48 | 19.51 | 23.23   |
| BET surface area(m <sup>2</sup> /g) | 520.3 | 35.2  | 18.03 | 30.16 | 24.31   |
| Pore diameter (nm)                  | -     | 2.8   | 2.5   | 3.3   | 3.2     |

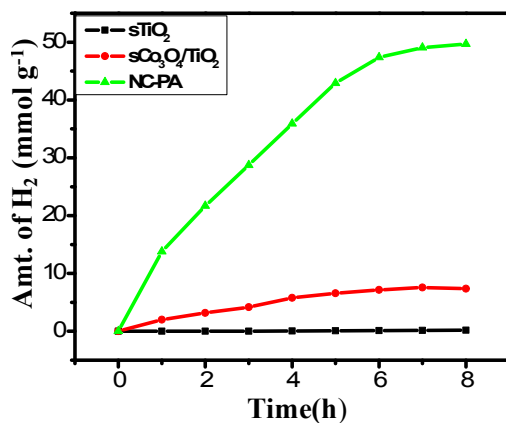

**Fig. S7** Time courses for photocatalytic H<sub>2</sub> production over bare TiO<sub>2</sub>, conventional Co<sub>3</sub>O<sub>4</sub>/TiO<sub>2</sub> nanocomposite and NC-PA nanocomposite.

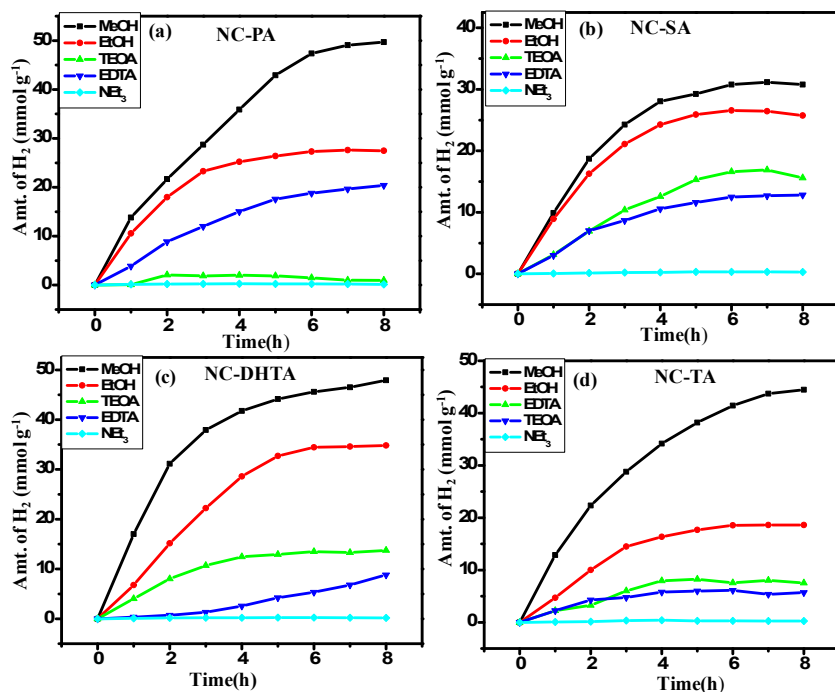

**Fig. S8** Time courses for photocatalytic H<sub>2</sub> production over different photocatalyst composite. Reaction condition: 20 ml of 15 vol% aqueous SED solution containing 20 mg photocatalyst, pH 7 and room temperature.
